# Supplementary material
Source: PubMed Central journal article supplement (PMC548573)

**[a] Yeast/Fly Clusters 144, 145  
Secretion**

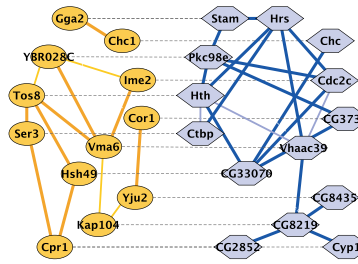

**[b] Yeast/Fly Peroxisome  
Clstrs. 651, 967-8, 1175-6, 1575**

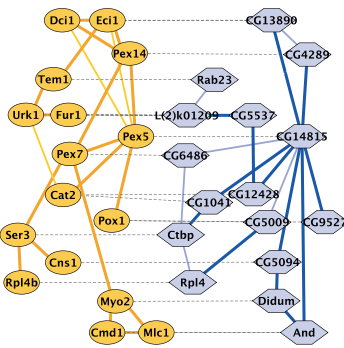

**[c] Yeast/Fly Clusters 354, 1445, 1645  
RNA processing, cytoskeleton, transport**

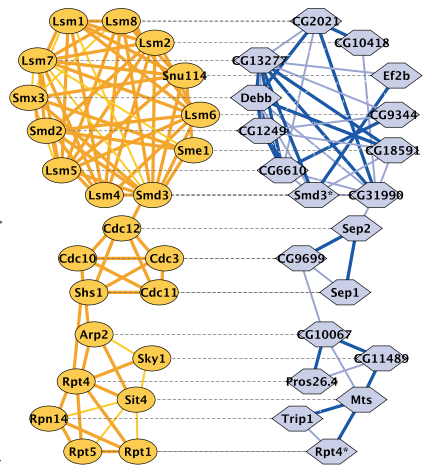

**[d] Yeast/Fly Clusters 1600, 1603  
Chaperones, Translocon**

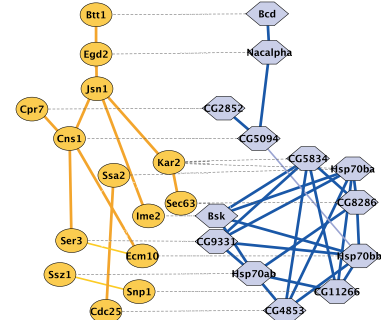

**[e] Yeast/Fly Cluster 342  
Ubiquitin ligation pathways**

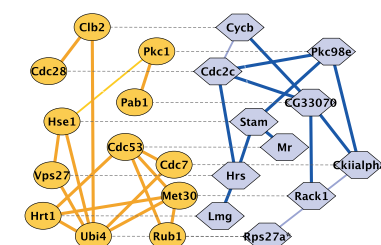

**[f] Yeast/Worm Clstrs. 121, 222, 433, 648  
Cyclin catabolism / APC Complex**

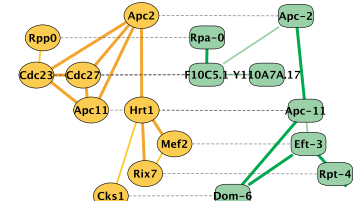

**[g] Yeast/Worm Clstrs. 161, 284, 340, 487  
Replication / Protein degradation /  
Signal transduction**

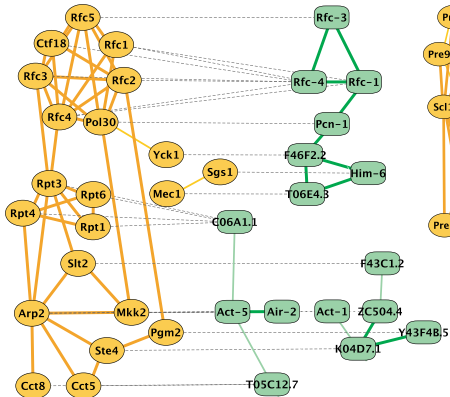

**[h] Yeast/Worm Clusters 415, 891  
Protein catabolism (proteasome)**

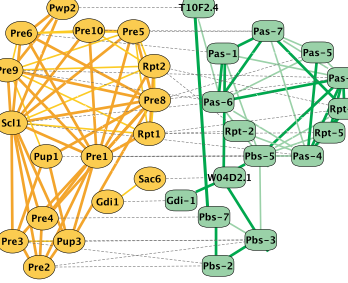

**[i] Worm/Fly Cluster 7  
Intracellular protein transport**

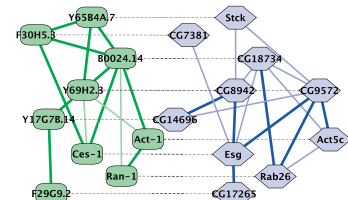

**[j] Worm/Fly Clstrs. 64, 83, 177, 221, 310  
Regulation of axon guidance**

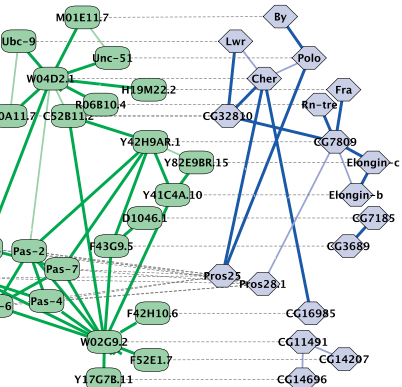

**[k] Worm/Fly Cluster 274  
Some heat shock, protein binding activity**

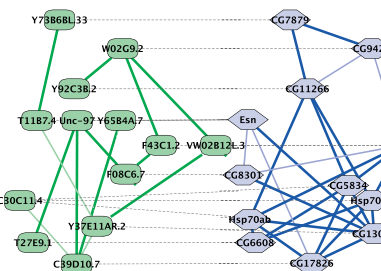

**[k] Worm/Fly Cluster 193  
Cell death**

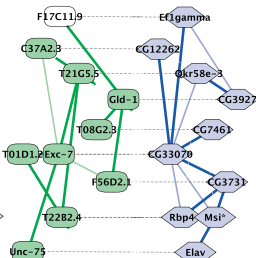

Supplement: pnas_102_6_1974__6.pdf [file pnas_102_6_1974__6.pdf]
