# Supplementary material
Source: PubMed Central journal article supplement (PMC548573)

**GO Cellular Processes**

- phosphorus metabolism
- intracellular transport
- signal transduction during conjugation w/ cell fusion
- small GTPase mediated signal transduction
- DNA metabolism
- RNA metabolism
- regulation of transcription from Pol I promoter
- development
- growth
- ribosome biogenesis and assembly
- cyclin catabolism
- protein metabolism
- protein catabolism
- modification-dependent protein catabolism

**Shared proteins**

- 30-35%
- 35-40%
- 40-45%
- 45-50%
- >50%

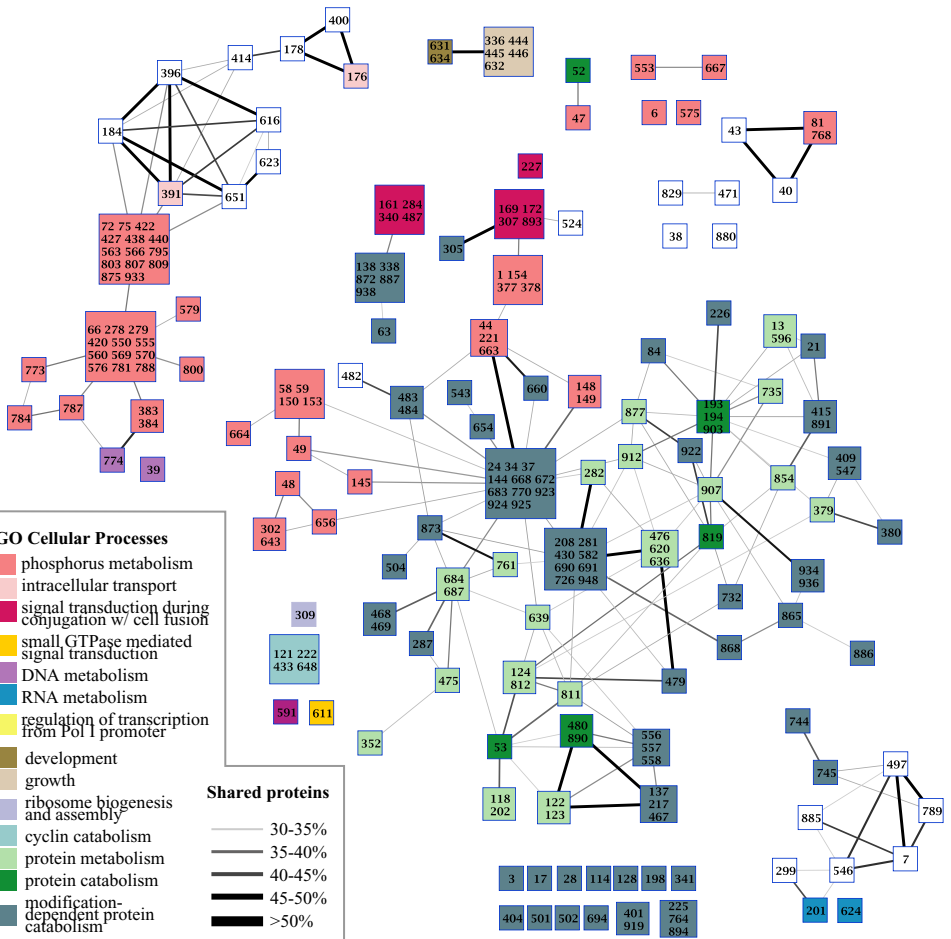

Supplement: pnas_102_6_1974__3.pdf [file pnas_102_6_1974__3.pdf]
