# Supplementary material
Source: PubMed Central journal article supplement (PMC548573)

# GO Cellular Processes

- ATP/ADP exchange
- Cell communication
- Cell differentiation
- Death
- Growth
- Homeostasis
- Larval development
- Learning / memory
- Membrane fusion
- Metabolism
- Morphogenesis
- Pattern specification
- Physiol. process, cellular
- Physiol. process, organismal
- Pigmentation
- Reg. of enzyme activity
- Reproduction
- Response to stimulus
- Rhythmic behavior
- Secretion
- Sex determination
- (DNA, RNA, protein)

## Shared proteins

- 30-35%
- 35-40%
- 40-45%
- 45-50%
- >50%

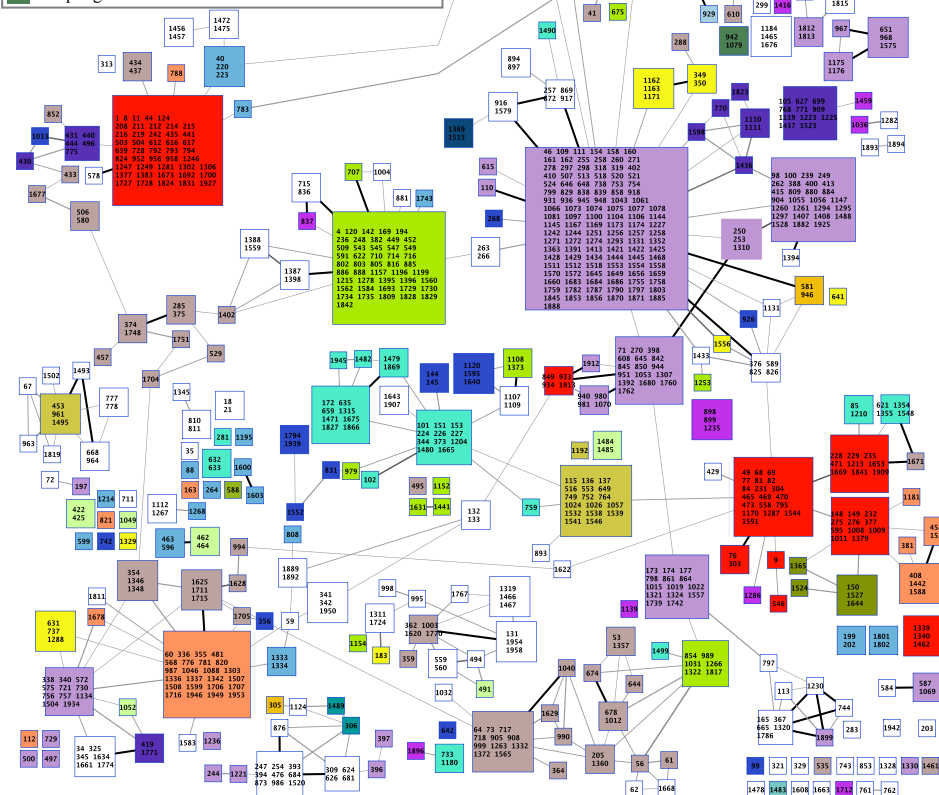

Supplement: pnas_102_6_1974__4.pdf [file pnas_102_6_1974__4.pdf]
