# Supplementary material
Source: PubMed Central journal article supplement (PMC548573)

[a] Minimal overlap w/ any cluster

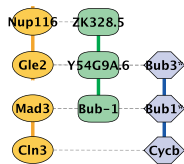

[b] Connects 186 to 906

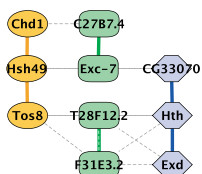

[c] Connects 218 to 238

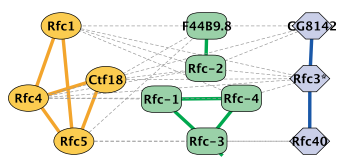

[d] Connects 446 to 740

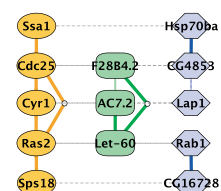

[e] Connects 900 to 902

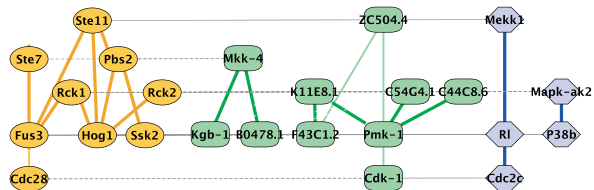

[f] Connects 927 to 940

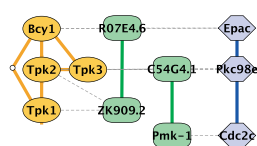

[g] Connects 990 to 999

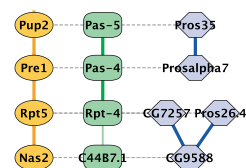

[h] Connects 996 to 902

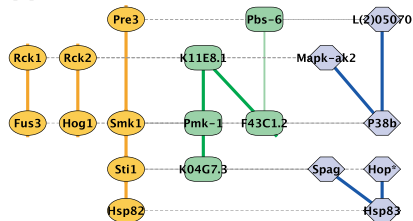

[i] Connects 766 to 900

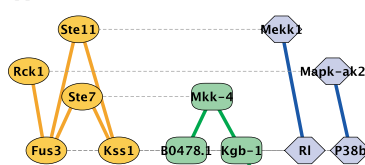

[j] Connects 999 to 1400

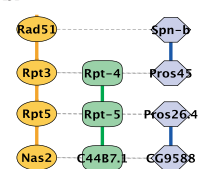

Supplement: pnas_102_6_1974__7.pdf [file pnas_102_6_1974__7.pdf]
