# Supplementary material
Source: PubMed Central journal article supplement (PMC548573)

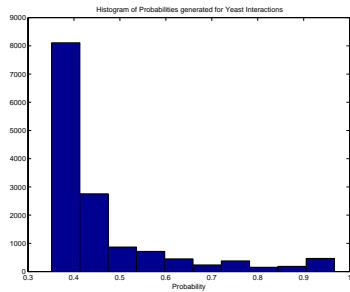

(a)

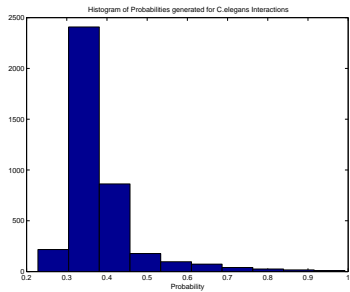

(b)

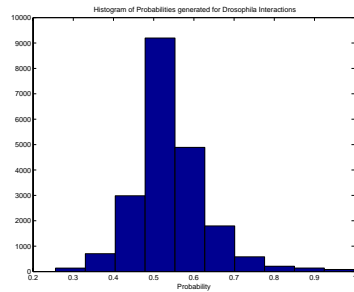

(c)

Supplement: pnas_102_6_1974__2.pdf [file pnas_102_6_1974__2.pdf]

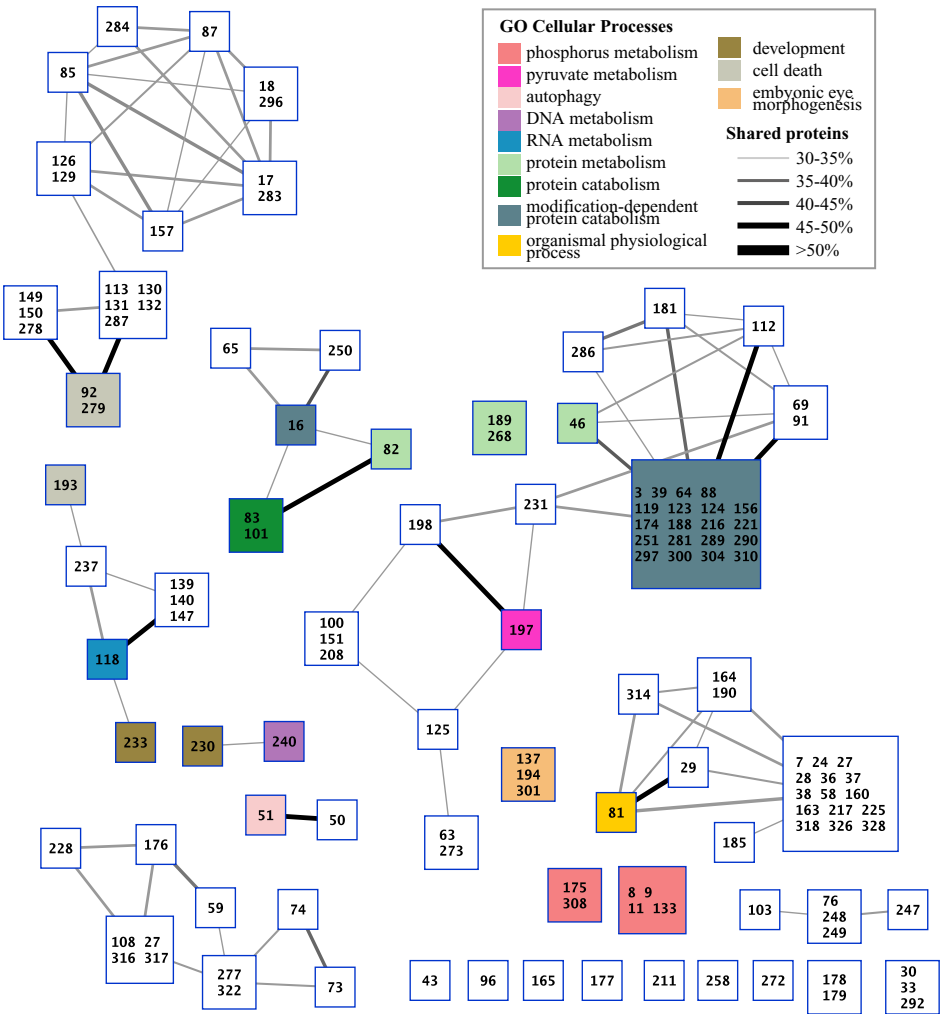

Supplement: pnas_102_6_1974__5.pdf [file pnas_102_6_1974__5.pdf]

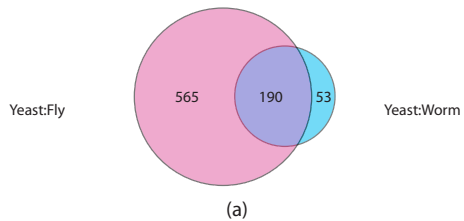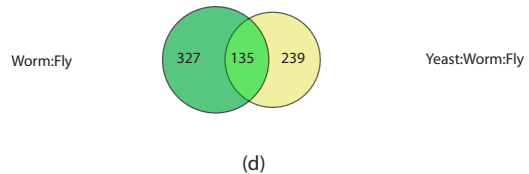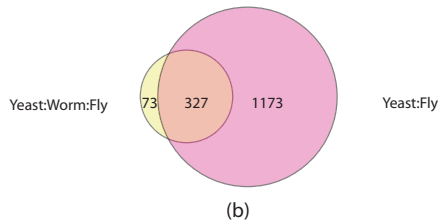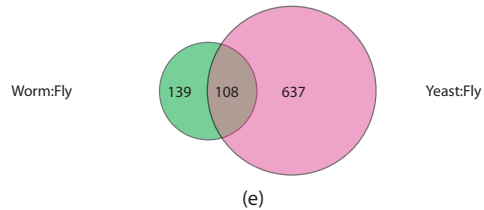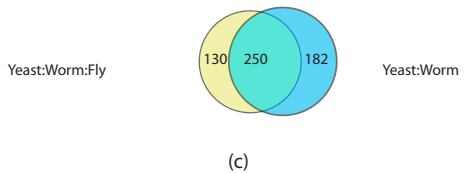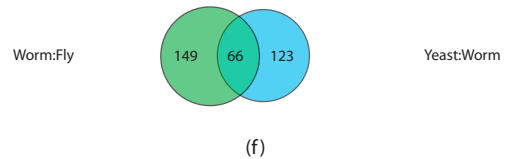

Supplement: pnas_102_6_1974__8.pdf [file pnas_102_6_1974__8.pdf]
